# Supplementary material for: Normal saline for children with bronchiolitis: study protocol for a randomised controlled non-inferiority trial
Source: HighWire-hosted journal article supplement (doi:10.1136/bmjpo-2023-002273), 2024-01-01
Supplement: bmjpo-2023-002273supp001_data_supplement.pdf [file bmjpo-2023-002273supp001_data_supplement.pdf]

## Appendices

### **A1: QUESTIONNAIRES USED FOR THE STUDY**

(English version – will be translated to Danish)

#### **A1.1: HR-QoL**

##### CHILD'S SYMPTOMS

ANSWER THE FOLLOWING QUESTIONS ABOUT YOUR CHILD'S ILLNESS

1. During the last week, how many days has your child presented the following symptoms?

|                                                      | 0 | 1/2 | 1 | 2 | 3 | 4 | 5 | 6 | 7 |
|------------------------------------------------------|---|-----|---|---|---|---|---|---|---|
| Cough                                                |   |     |   |   |   |   |   |   |   |
| Dyspnea (fast breathing, intercostal retractions...) |   |     |   |   |   |   |   |   |   |
| Wheezing                                             |   |     |   |   |   |   |   |   |   |
| Cyanosis (Blueness in face/lips)                     |   |     |   |   |   |   |   |   |   |
| Less appetite than usual                             |   |     |   |   |   |   |   |   |   |
| Full days without eating                             |   |     |   |   |   |   |   |   |   |
| Fever                                                |   |     |   |   |   |   |   |   |   |

2. In comparison with the previous week, your child's symptoms this week have been: much worst, somewhat worse, the same, somewhat better, much better.

##### CONCERN ABOUT CHILD'S SYMPTOMS

3. How worried have you felt about the following symptoms:

\* If in question 1 you marked "0 days", please go directly to question 6.

|                                                      | Not worried | Slightly worried | Quite worried | Very worried |
|------------------------------------------------------|-------------|------------------|---------------|--------------|
| Cough                                                |             |                  |               |              |
| Dyspnea (fast breathing, intercostal retractions...) |             |                  |               |              |
| Wheezing                                             |             |                  |               |              |
| Cyanosis (Blueness in face/lips)                     |             |                  |               |              |
| Less appetite than usual                             |             |                  |               |              |
| Full days without eating                             |             |                  |               |              |
| Fever                                                |             |                  |               |              |

4. If your child has presented fever, what was the highest temperature that he/she presented? (Select from 37 to 42°C)

5. Overall, during the last week, how worried have you felt about your child's disease? Not worried, slightly worried, quite worried, very worried.

6. In comparison to the previous week, your concern about your child's symptoms has been: much worst, somewhat worse, the same, somewhat better, much better.

#### CHILD'S BEHAVIOR DURING THE ILLNESS

The following questions are about your child's behavior during the illness.

Please select the box of the answer that best applies to your son/daughter's case.

7. During the last week, your child:

|                             | Never | Sometimes | Often | Always |
|-----------------------------|-------|-----------|-------|--------|
| Has slept more than usual   |       |           |       |        |
| Has slept less than usual   |       |           |       |        |
| Has cried more than usual   |       |           |       |        |
| Has been more irritable     |       |           |       |        |
| Has had less desire to play |       |           |       |        |
| Has been exhausted          |       |           |       |        |
| Has been less attentive     |       |           |       |        |
| Has needed more comfort     |       |           |       |        |

8. In comparison to the previous week, your child's behavior has been: much worst, somewhat worse, the same, somewhat better, much better.

#### CONCERN ABOUT CHILD'S ILLNESS

The following questions are about what you felt as a father/mother about your child's disease.

Please select the box of the answer that best applies to your case.

9. During the last week, have you had the following feelings concerning your child's illness?

|                                   | No at all | A little bit | A lot | A great deal |
|-----------------------------------|-----------|--------------|-------|--------------|
| Sadness to see my child being ill |           |              |       |              |
| Impotence                         |           |              |       |              |
| Mental exhaustion                 |           |              |       |              |
| Physical exhaustion               |           |              |       |              |
| Guiltiness                        |           |              |       |              |
| Fed up with the situation         |           |              |       |              |

10. In comparison to the previous week, your emotions about your son/daughter's illness this week have been: much worst, somewhat worse, the same, somewhat better, much better.

#### YOUR DAILY ACTIVITIES DURING YOUR CHILD'S DISEASE

How much has your child's illness interfered in your daily activities?  
Please select the box of the answer that best applies to your case.

11. During the last week and concerning your child's disease:

|                                                                                                              | 0 | 1/2 | 1 | 2 | 3 | 4 | 5 | 6 | 7 |
|--------------------------------------------------------------------------------------------------------------|---|-----|---|---|---|---|---|---|---|
| How many nights did the illness disrupted your sleep?                                                        |   |     |   |   |   |   |   |   |   |
| How many days did you have to dedicate exclusively to your child?                                            |   |     |   |   |   |   |   |   |   |
| How many days did you have to ask for help to someone else (parents, friends, neighbors...)?                 |   |     |   |   |   |   |   |   |   |
| How many days could not he/she attend nursery school, or you could not leave him/her home with a babysitter? |   |     |   |   |   |   |   |   |   |

12. During the last week and concerning your child's disease:

|                                                               | No at all | A little bit | A lot | A great deal |
|---------------------------------------------------------------|-----------|--------------|-------|--------------|
| Have you lost sleep hours?                                    |           |              |       |              |
| Your child's illness limited your leisure time?               |           |              |       |              |
| Your child's illness limited the time for doing the groceries |           |              |       |              |
| Your child illness limited the time for doing house chores    |           |              |       |              |

13. Who has completed this questionnaire? Mother, Father or other.

#### A1.2: Satisfaction with treatment:

1: Overall, how happy were you with the treatment given in hospital?

|                  |   |   |         |   |   |   |                |   |    |
|------------------|---|---|---------|---|---|---|----------------|---|----|
| 1                | 2 | 3 | 4       | 5 | 6 | 7 | 8              | 9 | 10 |
| Very unsatisfied |   |   | Neutral |   |   |   | Very satisfied |   |    |

2: If your child was given saline during treatment:

A: did your child react with crying or distress during administration of saline?

|   |   |   |   |   |   |   |   |   |    |
|---|---|---|---|---|---|---|---|---|----|
| 1 | 2 | 3 | 4 | 5 | 6 | 7 | 8 | 9 | 10 |
|---|---|---|---|---|---|---|---|---|----|

Strongly disagree

Neutral

Strongly Agree

B: Did you find that saline helped your child to clear the airways:

|   |   |   |   |   |   |   |   |   |    |
|---|---|---|---|---|---|---|---|---|----|
| 1 | 2 | 3 | 4 | 5 | 6 | 7 | 8 | 9 | 10 |
|---|---|---|---|---|---|---|---|---|----|

Strongly disagree

Neutral

Strongly Agree

3: After discharge, did you administrate saline to your child at home?

|     |                          |
|-----|--------------------------|
| Yes | <input type="checkbox"/> |
| No  | <input type="checkbox"/> |

## A2 Respiratory severity scoring with heart rate

| Score | Respiratory rate | Wheeze                                                | Heart rate <sup>a</sup> | SpO <sub>2</sub> | Accessory muscle use                                    |
|-------|------------------|-------------------------------------------------------|-------------------------|------------------|---------------------------------------------------------|
| 0     | <30              | None                                                  | <150                    | >95              | None                                                    |
| 1     | 30–45            | End-expiratory only                                   | 151–160                 | 94–95            | Mild intercostal retractions                            |
| 2     | 46–60            | Entire expiration and inspiration with stethoscope    | 161–170                 | 90–93            | Moderate retractions                                    |
| 3     | >60              | Entire expiration and inspiration without stethoscope | >170                    | <90              | Moderate retractions + head bobbing or tracheal tugging |

<sup>a</sup>RSS-HR = respiratory rate + wheeze + heart rate + accessory muscle use

<sup>b</sup>RSS-SO = respiratory rate + wheeze + SpO<sub>2</sub> + accessory muscle use
